# Supplementary material for: Cellular Models of Aggregation-dependent Template-directed Proteolysis to Characterize Tau Aggregation Inhibitors for Treatment of Alzheimer Disease
Source: PubMed Central journal article supplement (PMC4409250; doi:10.1074/jbc.m114.616029), 2015-03-10

**Cellular Models of Aggregation-Dependent Template-Directed Proteolysis to Characterize Tau Aggregation Inhibitors for Treatment of Alzheimer's Disease <sup>\*S</sup>**

Charles R. Harrington<sup>1,†,‡,§</sup>, John M. D. Storey<sup>‡,§,§</sup>, Scott Clunas<sup>§,§</sup>, Kathleen A. Harrington<sup>†</sup>, David Horsley<sup>†,§</sup>, Ahtsham Ishaq<sup>§,§</sup>, Steven J. Kemp<sup>§,§</sup>, Christopher P. Larch<sup>§,§</sup>, Colin Marshall<sup>§,§</sup>, Sarah L. Nicoll<sup>§,§</sup>, Janet E. Rickard<sup>†,§</sup>, Michael Simpson<sup>§,§</sup>, James P. Sinclair<sup>§,§</sup>, Lynda J. Storey<sup>§,§</sup>, and Claude M. Wischik<sup>1,†,‡,§</sup>

From the <sup>†</sup> School of Medicine and Dentistry, University of Aberdeen, Aberdeen AB25 2ZP, UK; <sup>‡</sup> TauRx Therapeutics Ltd., Singapore 068805, and the <sup>§</sup> Department of Chemistry, University of Aberdeen, Aberdeen AB24 3UE, UK

<sup>°</sup> Running title: *Cell models of tau aggregation*

<sup>1</sup> To whom correspondence should be addressed: Charles R. Harrington, School of Medicine and Dentistry, University of Aberdeen, Foresterhill, Aberdeen AB25 2ZP, UK, Tel: (+44) 1224 438563; Fax: +44 1224 555173; E-mail: [c.harrington@abdn.ac.uk](mailto:c.harrington@abdn.ac.uk)

Claude M. Wischik, School of Medicine and Dentistry, University of Aberdeen, Foresterhill, Aberdeen AB25 2ZP, UK, Tel: (+44) 1224 438550; Fax: +44 1224 555173; E-mail: [cmw@taurx.com](mailto:cmw@taurx.com)

## Supplemental data

**(Experimental; 2 Tables; 2 Figures)**

### Experimental

#### **Synthesis of *N,N,N',N'*-tetramethyl-10*H*-phenothiazine-3,7-diamine derivatives.**

10-Acetyl-*N,N,N',N'*-tetramethyl-10*H*-phenothiazine-3,7-diamine was synthesized and used as the starting material for the synthesis of *N,N,N',N'*-tetramethyl-10*H*-phenothiazine-3,7-diaminium dibromide (leucomethylthioninium dihydrobromide; LMTB) and *N,N,N',N'*-tetramethyl-10*H*-phenothiazine-3,7-diaminium bismethanesulphonate (leucomethylthioninium dihydromesylate; LMTM). The structures of LMTM and LMTB are included in Fig. 1B.

**Synthesis of 10-acetyl-*N,N,N',N'*-tetramethyl-10*H*-phenothiazine-3,7-diamine.**

MTC (150.0 g, 0.387 mol inclusive of 17.5% w/w H<sub>2</sub>O) was added to a three-neck round bottomed flask under a N<sub>2</sub> atmosphere. Acetonitrile (300 ml) was added, followed by triethylamine (83.9 ml, 0.601 mol) and hydrazine monohydrate (11.7 ml, 0.241 mol). The mixture was heated to 70 °C and held at this temperature for 1 hour, after which the temperature was reduced to 50 °C and acetic anhydride (227.6 ml, 2.406 mol) was added over 30 min. The mixture was then heated to 95 °C and held for 2 h, after which the temperature was reduced to 60 °C and water (345 ml) was added over 30 min. The resulting slurry was cooled to and held at 3 °C for 2 h. The solid was collected by filtration and washed with water (3 x 300 ml) followed by drying under vacuum (10 mmHg) for 18 h at 50 °C to give the title compound as a grey solid; mp 179-181 °C (93.01 g, 71%).

<sup>1</sup>H NMR (DMSO-*d*<sub>6</sub>, 400 MHz, ppm): δ 2.05 (3H, s, COCH<sub>3</sub>), 2.89 (12H, s, 2N(CH<sub>3</sub>)<sub>2</sub>), 6.66 (2H, dd, *J* = 8.6 & 2.4 Hz, 2ArH), 6.74 (2H, d, *J* = 2.4 Hz, 2ArH), 7.33 (2H, d, *J* = 8.6 Hz, 2ArH); <sup>13</sup>C NMR (CDCl<sub>3</sub>, 100 MHz, ppm): δ 23.0 (CH<sub>3</sub>), 40.6 (2NCH<sub>3</sub>), 110.7 (2ArC), 110.9 (2ArC), 127.0 (2ArC), 128.9 (2ArC), 148.9 (2ArC), 170.1 (C=O); FTIR, diamond, cm<sup>-1</sup>: ν<sub>max</sub> 1657 (m), 1592 (m), 1496 (m), 1322 (m), 1008 (m), 857 (m), 806 (s); MS (TOF ESI positive mode): *m/z* calc'd for [M]<sup>+</sup>, (C<sub>18</sub>H<sub>21</sub>N<sub>3</sub>OS)<sup>+</sup>: 327; Found: 284 (100%, [M – OAc]<sup>+</sup>), 328 (67%, [M + H]<sup>+</sup>), 350 (37%, [M + Na]<sup>+</sup>).

**Synthesis of *N,N,N',N'*-tetramethyl-10*H*-phenothiazine-3,7-diaminium dibromide (LMTB).**

10-Acetyl-*N,N,N',N'*-tetramethyl-10*H*-phenothiazine-3,7-diamine (300 g, 0.917 mol) was slurried in water (375 ml) and hydrobromic acid (690 ml, 48%, 6.13mol) was added over 5 min. The mixture was heated at 80 °C for 2 h then cooled and held at 5 °C for 1 h. The solid that

precipitated from solution was collected by filtration. This was then dissolved in water (923 ml) and hydrobromic acid (92.3 ml, 48%, 0.82 mol), before being heated at 90 °C for 20 min. The mixture was cooled to 40 °C and a second aliquot of hydrobromic acid (92.3 ml, 48%, 0.82 mol) was added. The mixture was then cooled and held at 5 °C for 1 h to crystallise the product from solution. The product was collected by filtration and dried at 40 °C under reduced pressure (10 mmHg) to give the title compound as pale yellow-green crystals; mp 270-280 °C with decomposition (335 g, 82%) (99.7% pure by HPLC analysis).

<sup>1</sup>H NMR (D<sub>2</sub>O, 400 MHz, ppm): δ 3.07 (12H, s, N(CH<sub>3</sub>)<sub>2</sub>), 6.63 (2H, d, *J* = 8.8 Hz, Ar-H), 7.08 (2H, d, *J* = 8.8 Hz, Ar-H), 7.09 (2H, s, Ar-H); <sup>13</sup>C NMR (D<sub>2</sub>O, 100 MHz, ppm): δ 46.3 (2N(CH<sub>3</sub>)<sub>2</sub>), 115.2 (2Ar-C), 118.1 (2Ar-C), 118.4 (2Ar-C), 120.0 (2Ar-C), 136.8 (2Ar-C), 142.3 (2Ar-C); FTIR, KBr disc, cm<sup>-1</sup>: ν<sub>max</sub> 3459 (b), 3237 (m), 3194 (m), 3119 (m), 3048 (m), 3013 (m), 2954 (m), 2877 (m), 1487 (s), 1405 (s), 1316 (s), 1188 (m), 1125 (m); Elemental Analysis (% w/w): Theoretical C = 42.97, H = 4.73, N = 9.40, Br = 35.73; Found C = 42.65, H = 4.66, N = 9.30, Br = 35.69; MS (ESI positive mode): *m/z* calc'd for [M]<sup>+</sup> (C<sub>16</sub>H<sub>19</sub>N<sub>3</sub>S): 285; Found: 285 (100%, [M]<sup>+</sup>), 286 (45%, [M+H]<sup>+</sup>).

**Synthesis of *N,N,N',N'*-tetramethyl-10*H*-phenothiazine-3,7-diaminium bismethanesulphonate (LMTM).**

10-Acetyl-*N,N,N',N'*-tetramethyl-10*H*-phenothiazine-3,7-diamine (100.0 g, 0.305 mol) was added to a three-necked round bottomed flask equipped with a condenser, dropping funnel and a thermometer. Methanesulphonic acid (68.5 ml, 70%, 0.672 mol) and H<sub>2</sub>O (10 ml) was added, and the mixture heated to and held at 78 °C for 2.5 h. The reaction progress was monitored by TLC (1:1 EtOAc/40:60 petrol; *R<sub>f</sub>*: 0.75). Upon completion, the mixture was cooled to 50 °C

whereupon ethanol (500 ml) was added drop-wise over 2 h. The mixture was then cooled to 5 °C for 1 h and the light green solid that precipitated was collected by filtration, washed with acetonitrile (3 x 100 ml) and dried at 38 °C for 18 h; mp 271 °C (130.0 g, 89%).

<sup>1</sup>H NMR (CD<sub>3</sub>OD, 600 MHz, ppm): δ 2.71 (6H, s, 2CH<sub>3</sub>SO<sub>3</sub>), 3.21 (12H, s, 2N(CH<sub>3</sub>)<sub>2</sub>), 6.75 (2H, d, *J* = 8.8 Hz, 2ArH), 7.22 (2H, d, *J* = 2.8 Hz, 2ArH), 7.24 (2H, dd, *J* = 8.8 & 2.9 Hz, 2ArH); <sup>13</sup>C NMR (CD<sub>3</sub>OD, 150 MHz, ppm, MeOH-*d*<sub>4</sub>): δ 38.2 (2CH<sub>3</sub>SO<sub>3</sub>), 45.9 (2NMe<sub>2</sub>), 115 (2ArCH), 118.2 (2ArCH), 118.7 (2ArC), 119.9 (2ArCH), 137.1 (2ArC), 142.8 (2ArC); FTIR, KBr disc, cm<sup>-1</sup>: ν<sub>max</sub> 3430 (b), 3014 (m), 2649 (m), 1614 (m), 1487 (s), 1318 (s), 1199 (s), 1059 (s), 823 (s); Elemental Analysis (% w/w): Theoretical C = 45.26; H = 5.70; N = 8.80; S = 20.14; Found C = 45.19; H = 5.53; N = 8.76; S = 19.84; Exact mass (TOF ES<sup>+</sup> *m/z*): calc'd for [M]<sup>+</sup> (C<sub>16</sub>H<sub>19</sub>N<sub>3</sub>S): 285.129970, Found = 285.131292; UV (λ<sub>max</sub> nm): 255.

**Synthesis of Methylene White (MW).** MTC (17.58% w/w H<sub>2</sub>O) (9.48 g, 24.5 mmol) and acetonitrile (50 ml) were loaded under a positive flow of argon into a glass ampoule fitted with a Young's tap. Hydrazine monohydrate (2.70 g, 54.0 mmol) was added cautiously, also under a positive flow of argon, and the reaction mixture was heated to 50 °C. After 3 h at 50 °C the reaction mixture was cooled to 5 °C. The resulting brown solution was filtered away from the solid by filter cannula using a positive flow of argon. The green solid left behind was washed with cold (5 °C) acetonitrile (1 x 30 ml) using a filter cannula. The green solid was then dried *in vacuo* for 10 mins and tetrahydrofuran (THF) (20 ml) was added. The orange THF solution was filtered away from insoluble residues by filter cannula into a second argon filled ampoule and subsequent removal of the THF *in vacuo* gave the title compound as a pale yellow solid that was stored under argon.

$^1\text{H}$  NMR (THF- $d_8$ , 400 MHz, ppm):  $\delta$  2.72 (12H, s,  $2\text{N}(\text{CH}_3)_2$ ), 6.34-6.41 (6H, m, Ar-H), 6.79 (1H, s, NH);  $^{13}\text{C}$  NMR (THF- $d_8$ , 100 MHz, ppm):  $\delta$  41.6 (4C,  $\text{N}(\text{CH}_3)_2$ ) 112.4 (2Ar-C); 113.3 (2Ar-C); 115.2 (2Ar-C); 119.2 (2Ar-C); 135.4 (2Ar-C); 147.5 (2Ar-C). FT-IR (Nicolet IR100 Diamond,  $\text{cm}^{-1}$ ): 3392 (w), 2791 (br), 1601 (w), 1500 (s) 1477 (s), 1303 (s), 1220 (s), 796 (s); MS (ESI positive mode):  $m/z$  calc'd for  $[\text{M}]^+$  ( $\text{C}_{16}\text{H}_{19}\text{N}_3\text{S}$ ): 285; Found = 143  $[\text{M}+\text{H}/2]^{2+}$  100%, 285  $[\text{M}]^+$  72%, 286  $[\text{M}+\text{H}]^+$  70%. UV ( $\lambda_{\text{max}}$  nm): 260.

Table S1. Metal content analyses for three batches of LMTM, synthesised to semi-commercial scale, and compared with the European Pharmacopoeia (EP) 5.4 limits for heavy metals in methylthioninium chloride (Council of Europe (2006) Methylthioninium chloride. European Pharmacopoeia Edn. 5.4:pp. 3977-3979).

| Metal      | Maximum content (ppm) in EP 5.4 | Metal content in LMTM batches (ppm) |                 |                 |
|------------|---------------------------------|-------------------------------------|-----------------|-----------------|
|            |                                 | Batch 1 (86 kg)                     | Batch 2 (90 kg) | Batch 3 (79 kg) |
| Copper     | 300 ppm                         | < 10                                | < 10            | < 10            |
| Zinc       | 100 ppm                         | < 10                                | < 10            | < 10            |
| Aluminium  | 100 ppm                         | < 10                                | < 10            | < 10            |
| Cadmium    | 1 ppm                           | < 0.1                               | < 0.1           | < 0.1           |
| Chromium   | 100 ppm                         | < 10                                | < 10            | < 10            |
| Tin        | 10 ppm                          | < 1                                 | < 1             | < 1             |
| Iron       | 200 ppm                         | < 10                                | < 10            | < 10            |
| Manganese  | 10 ppm                          | < 1                                 | < 1             | < 1             |
| Mercury    | 1 ppm                           | < 0.1                               | < 0.1           | < 0.1           |
| Molybdenum | 10 ppm                          | < 1                                 | < 1             | < 1             |
| Nickel     | 10 ppm                          | 1                                   | 1               | < 1             |
| Lead       | 10 ppm                          | < 1                                 | < 1             | < 1             |

Table S2. Stability data for a representative LMTM sample stored at 30 °C and 65% relative humidity. Assay for potency and water content are expressed as % mean values by wt. XRPD was tested initially and after 12 and 24 months. ND, not detected; RH, relative humidity; MT, methylthionium ion; acetyl MT, 10-Acetyl-*N,N,N',N'*-tetramethyl-10*H*-phenothiazine-3,7-diamine; --, not tested (Azure B was never detected at the 1-month time-point in batches and was only tested thereafter at the 24-months).

| Test                      | Initial sample | Storage condition (30°C / 65% RH) (months) |       |       |        |        |       |        |
|---------------------------|----------------|--------------------------------------------|-------|-------|--------|--------|-------|--------|
|                           |                | 1                                          | 3     | 6     | 9      | 12     | 18    | 24     |
| Assay (mean)              | 99.7%          | 99.1%                                      | 99.8% | 99.8% | 100.0% | 99.8%  | 99.2% | 99.4%  |
| <i>Related substances</i> |                |                                            |       |       |        |        |       |        |
| Leuco-Azure B             | ND             | ND                                         | ND    | ND    | ND     | ND     | ND    | <0.05% |
| MT                        | 0.63%          | 0.75%                                      | 0.50% | 0.62% | 0.74%  | 0.58%  | 0.95% | 0.55%  |
| Acetyl MT                 | ND             | ND                                         | ND    | ND    | ND     | ND     | ND    | ND     |
| Azure B                   | --             | --                                         | --    | --    | --     | --     | --    | ND     |
| Total impurities          | 0.63%          | 0.75%                                      | 0.50% | 0.62% | 0.74%  | 0.58%  | 0.95% | 0.55%  |
| Water content (mean)      | 0.04%          | 0.07%                                      | 0.14% | 0.11% | 0.04%  | 0.04%  | 0.13% | 0.07%  |
| XRPD                      | Form A         | --                                         | --    | --    | --     | Form A | --    | Form A |

Fig. S1. The Raman spectrum of LMTM form A showing a significant background from fluorescence. However, a number of sharp signals are observed and can be used for the identification of the crystalline form. The instrument used was Bruker RF100. Nd:YAG 1064 nm excitation, 50 mW laser power, Ge-detector, 128 scans, range 50-3500  $\text{cm}^{-1}$ , 2  $\text{cm}^{-1}$  resolution; with an aluminium sample holder.

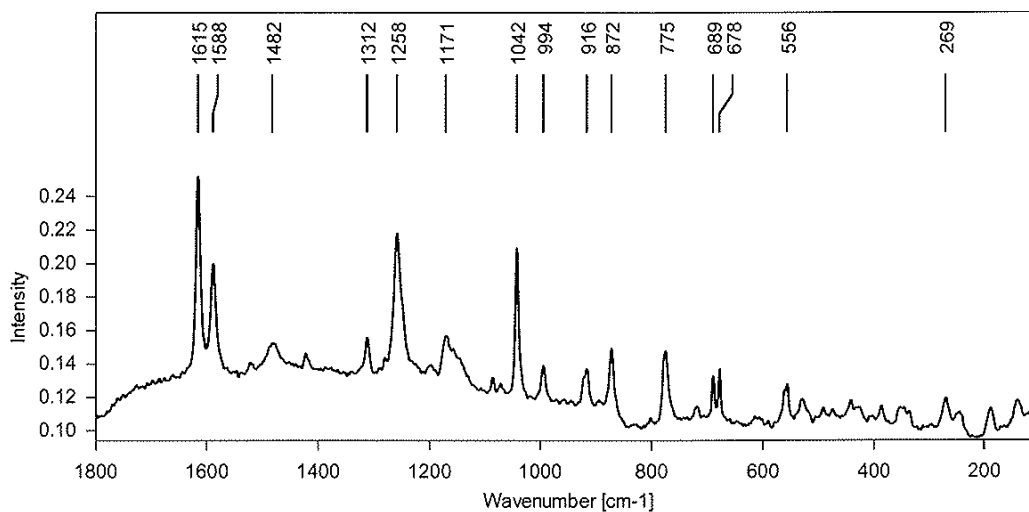



Fig. S2. X-ray diffraction pattern (XRDP) analysis of LMTM polymorphic form A. (Bruker D8 Advance, Cu Ka radiation ( $\lambda = 1.54180 \text{ \AA}$ ), 40 kV/40 mA Lynex Eye detector,  $0.02^\circ$  step size in  $2\theta$ , 37s per step,  $2.5^\circ$ - $50^\circ$   $2\theta$  scanning range). The samples were prepared on silicon single crystal sample holders with 0.1- or 1.0-mm depth without any special treatment other than the application of slight pressure to get a flat surface. All samples were rotated during the measurement.

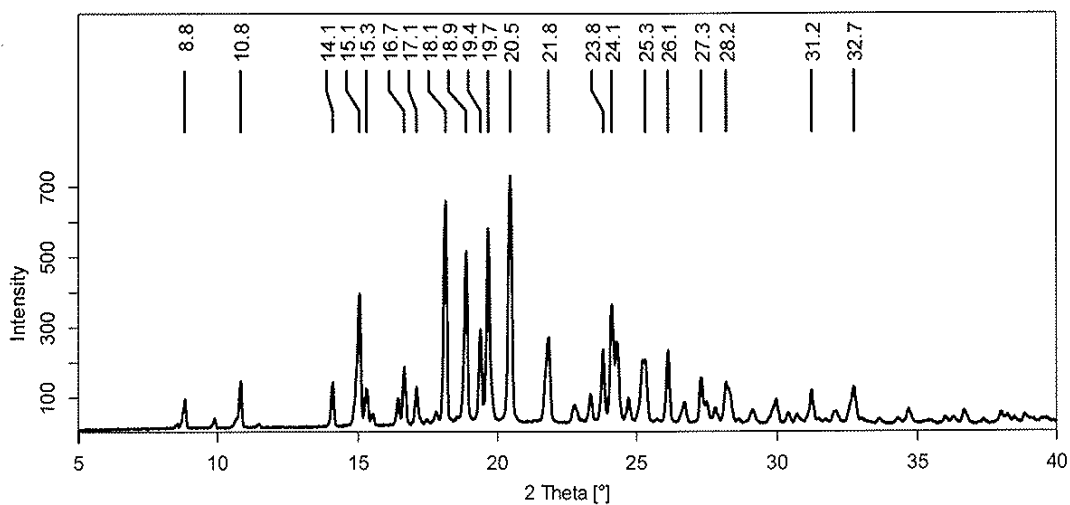

Supplement: supp_M114.616029_jbc.M114.616029-1.pdf [file supp_M114.616029_jbc.M114.616029-1.pdf]
